# Supplementary material for: The evolution of a counter-defense mechanism in a virus constrains its host range
Source: eLife journal article supplement (doi:10.7554/elife.79549), 2022-08-04

| <b>A</b>    |  | <b>variants</b>                                                                                  | <b>deletion</b> | <b>size (bp)</b> | <b>genes (#)</b> | <b>microhomology</b>                            |
|-------------|--|--------------------------------------------------------------------------------------------------|-----------------|------------------|------------------|-------------------------------------------------|
| evo 1 clone |  | <i>βgt</i> (G214C);<br><i>nrdC.3</i> (T154N);<br><i>regA</i> (K41 / TΔ);<br><i>rl</i> (K65 / TΔ) | Δ1              | 4235             | 9                | AGTACACC                                        |
|             |  |                                                                                                  | Δ2              | 5880             | 12               | TTTCAAGCATTC                                    |
|             |  |                                                                                                  | Δ3              | 697              | 1                | GCTTCGGCAATAAATTCTTGATATGTTTTCATATGTTTCCTTTAAAT |
| evo 2 clone |  | <i>tifA</i> (F41S);<br>7 (R638C);<br><i>mliA</i> (C309R)                                         | Δ1              | 4619             | 8                | TGGTCATCTGGT                                    |
|             |  |                                                                                                  | Δ2              | 3536             | 9                | CTTCGGCA                                        |
|             |  |                                                                                                  | Δ3              | 2638             | 10               | GGCTTCA                                         |
| evo 3 clone |  | <i>rlII</i> (Q47K)                                                                               | Δ1              | 5457             | 14               | CAC                                             |
|             |  |                                                                                                  | Δ2              | 5461             | 7                | AGTTTTCAT                                       |
| evo 4 clone |  | <i>rl</i> (P28H);<br>37 (Y953R)                                                                  | Δ1              | 3640             | 8                | CCA                                             |
|             |  |                                                                                                  | Δ2              | 3797             | 10               | TATTGCGTCCA                                     |
| evo 5 clone |  | -                                                                                                | Δ1              | 4381             | 6                | TTTCTCACT                                       |
|             |  |                                                                                                  | Δ2              | 697              | 1                | GCTTCGGCAATAAATTCTTGATATGTTTTCATATGTTTCCTTTAAAT |

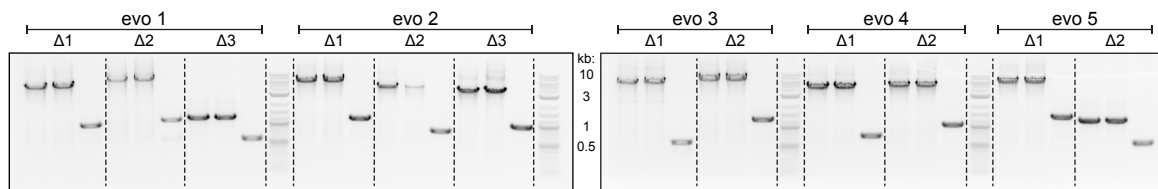

T4 ancestor  
control evo  
evo clone

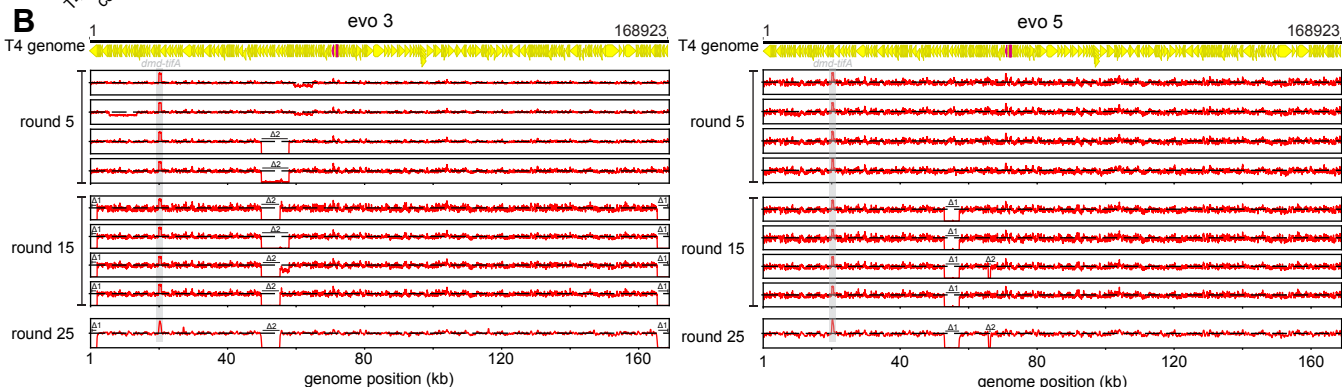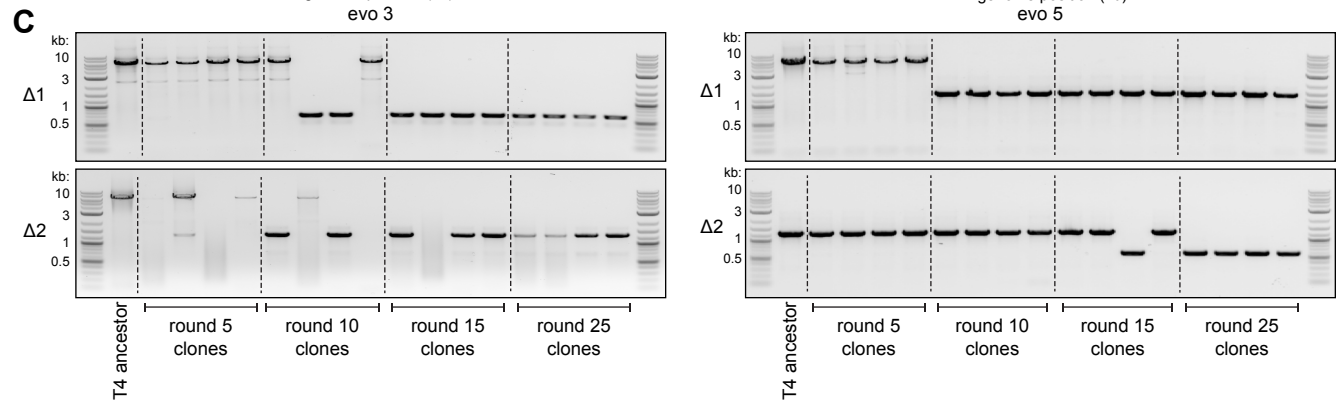

Supplement: supp [file elife_poa_e79549_Figure_5_figure_supplement_1.pdf › elife_poa_e79549_Figure_5_figure_supplement_1.pdf]
