# Supplementary material for: The evolution of a counter-defense mechanism in a virus constrains its host range
Source: eLife journal article supplement (doi:10.7554/elife.79549), 2022-08-04

# The evolutions of a counter-defense mechanism in a virus constrains its host range

Srikant S, Guegler CK, Laub MT

Labelled source data

Figure 1E

source data file: Figure1E\_source-data1.tif

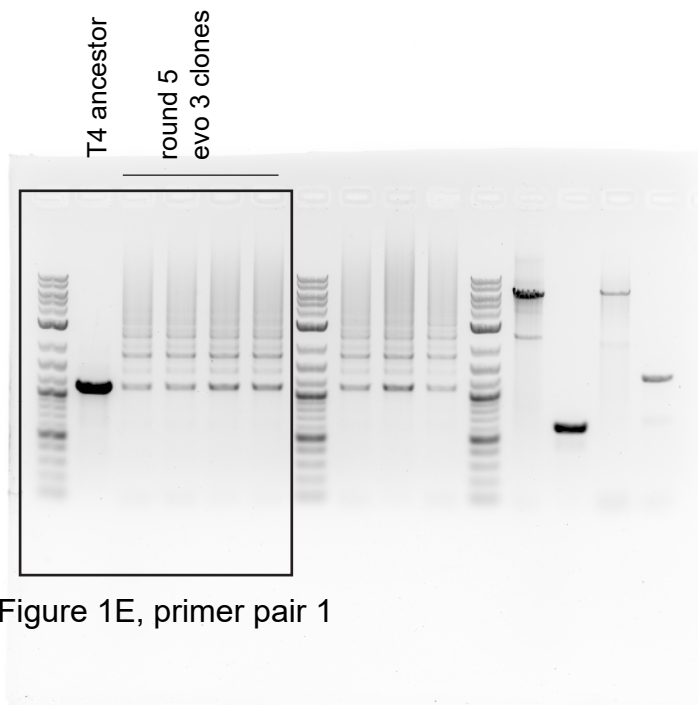

Figure 1E, primer pair 1

Figure 1E

source data file: Figure1E\_source-data2.tif

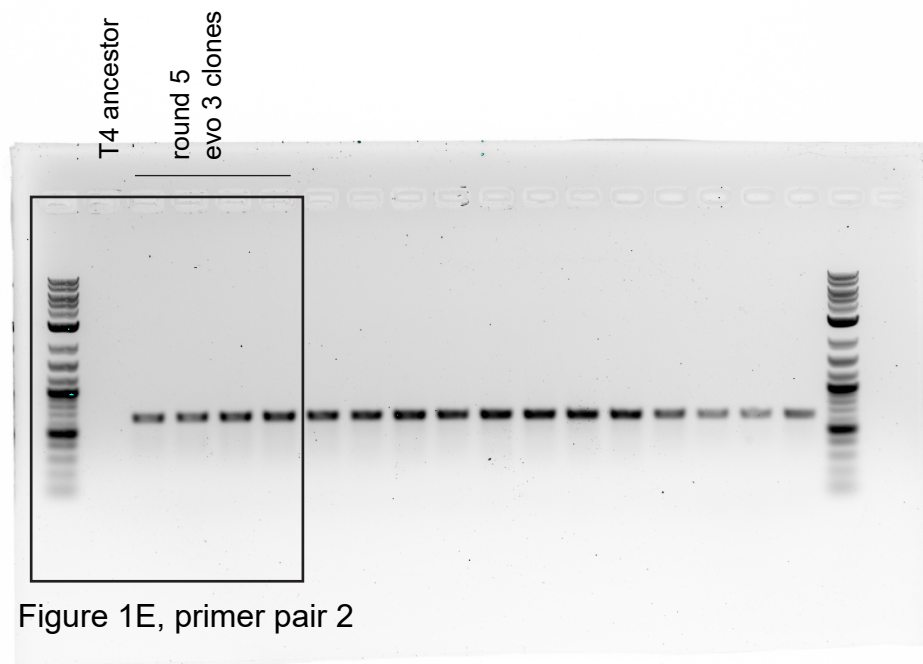

Figure 2E: anti-His<sub>6</sub> blot

Source data file: Figure2E\_source-data-antiHis6blot\_chemiluminescence.png

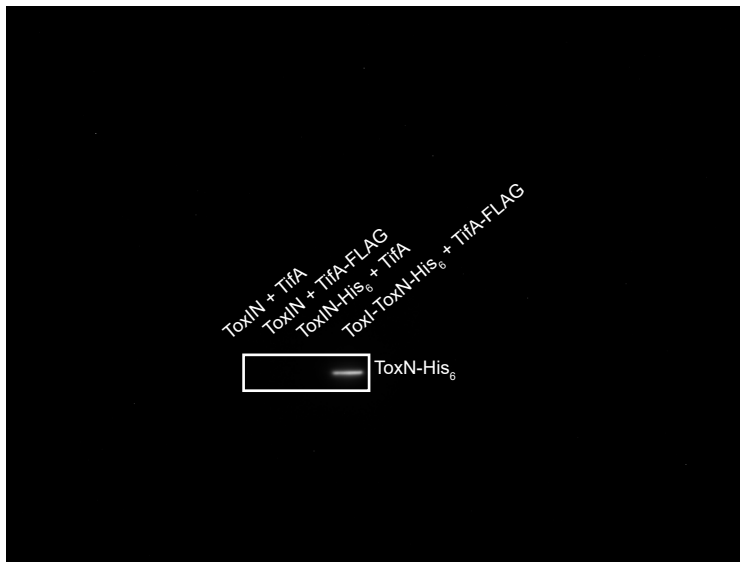

Figure 2E: anti-FLAG blot

Source data file: Figure2E\_source-data-antiFLAGblot\_chemiluminescence.png

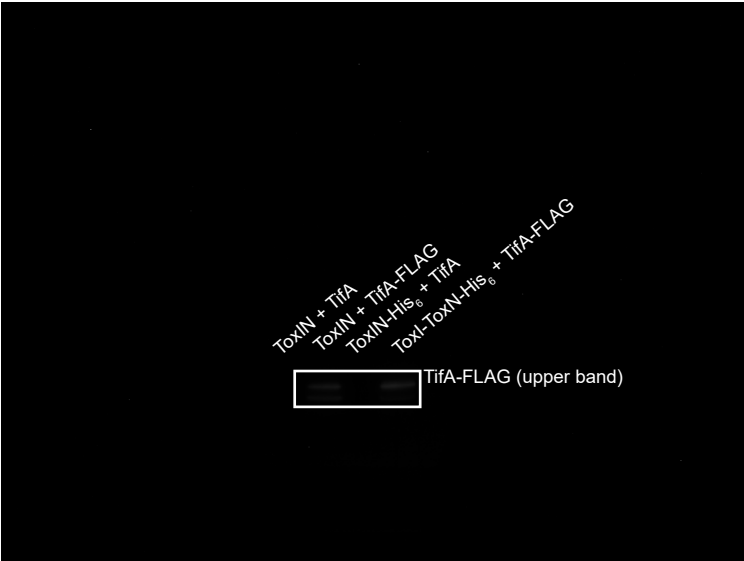

Image with contrast adjusted to better show bands:

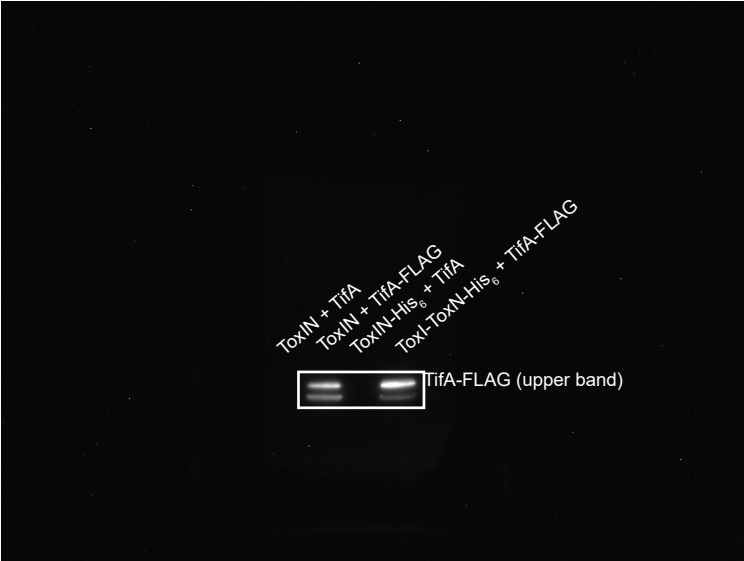

Figure 4E

source data file: Figure4E\_source-data1.png

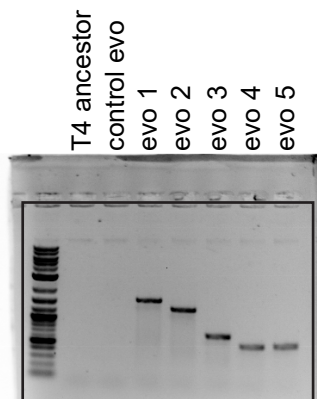

Figure 4E, primer pair 2

Figure 4 - figure supplement 1B

source data file: Figure4-figure-supplement-1B\_source-data1.tif

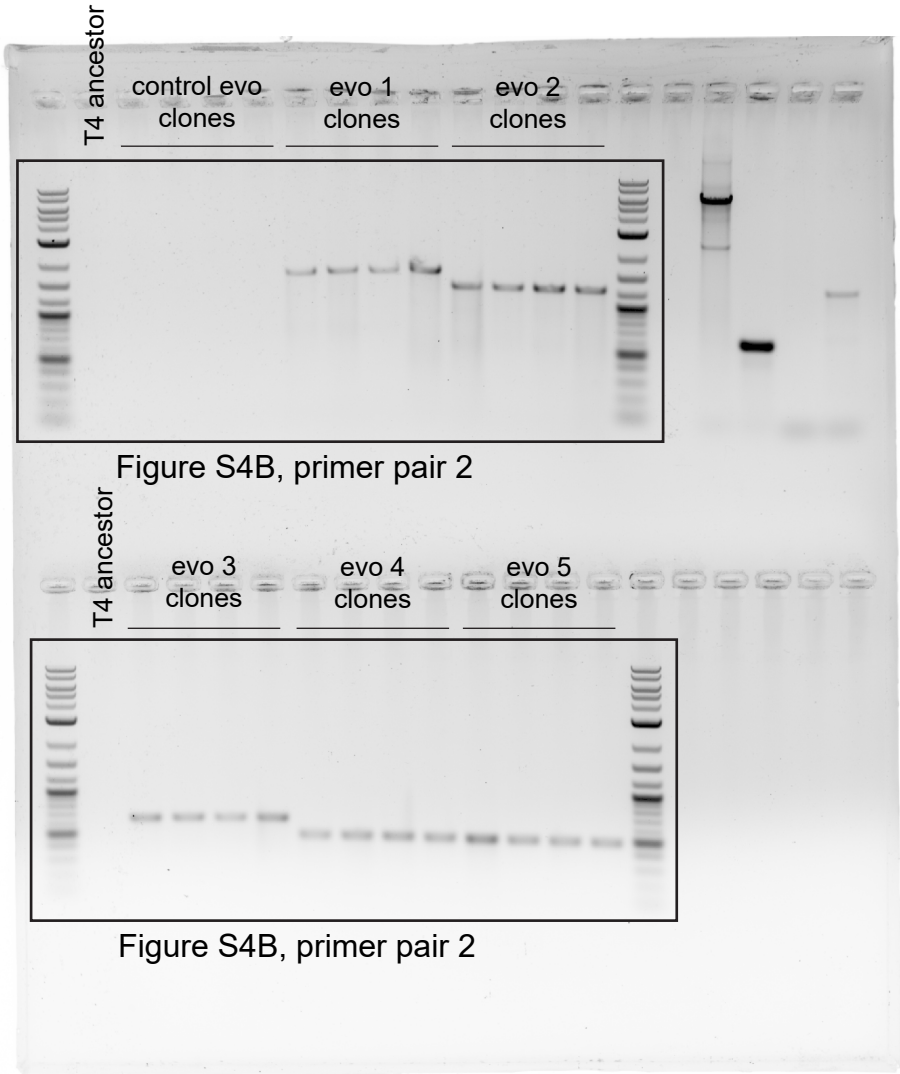

Figure 5 - figure supplement 1A

source data file: Figure5-figure-supplement1A\_source-data1.tif

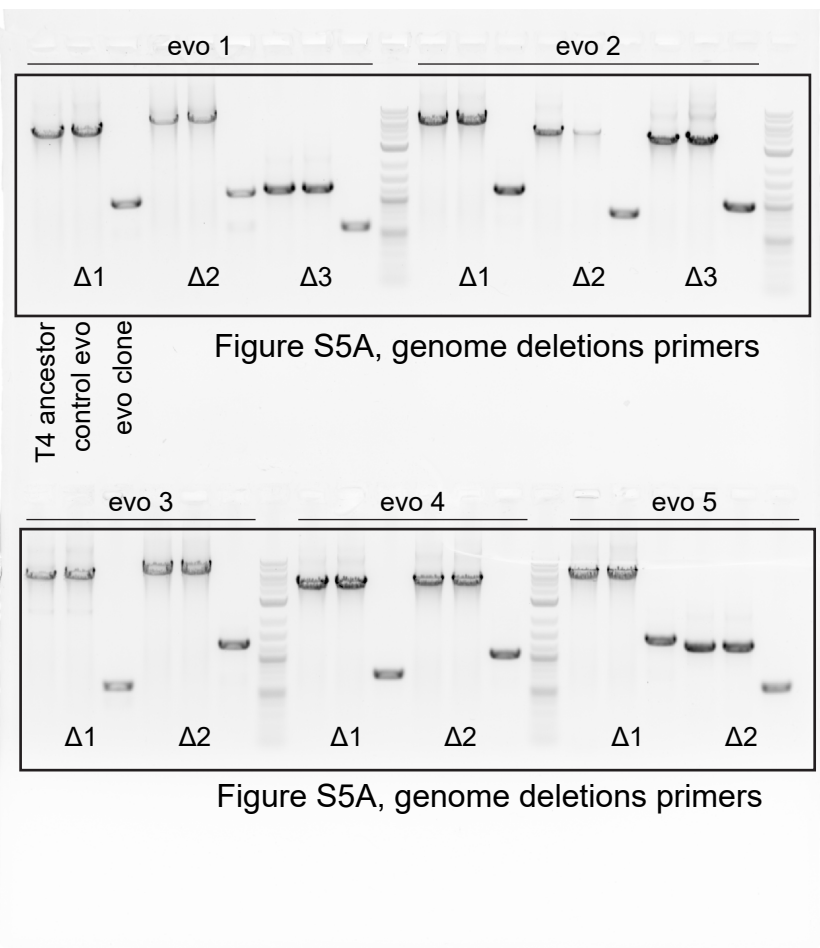

Figure 5 - figure supplement 1C

source data file: Figure5-figure-supplement-1C\_source-data1.tif

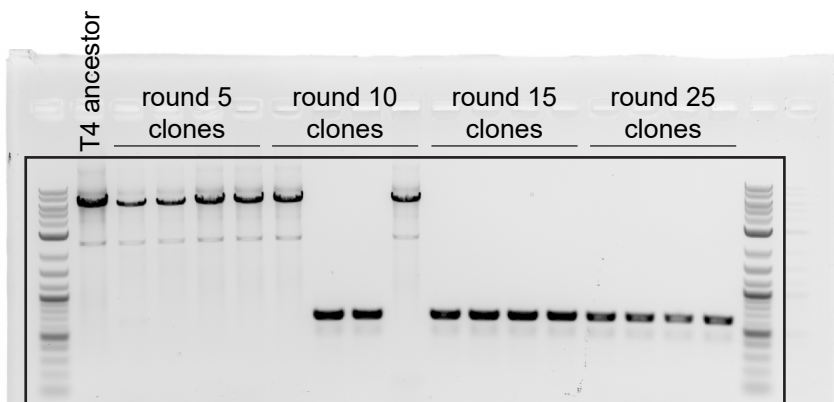

Figure S5C, evo 3 genome deletion  $\Delta 1$

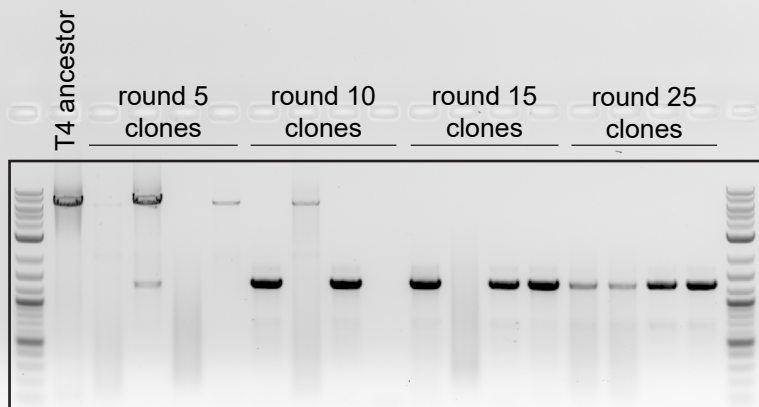

Figure S5C, evo 3 genome deletion  $\Delta 2$

Figure 5 - figure supplement 1C  
source data file: Figure5-figure-supplement-1C\_source-data2.tif

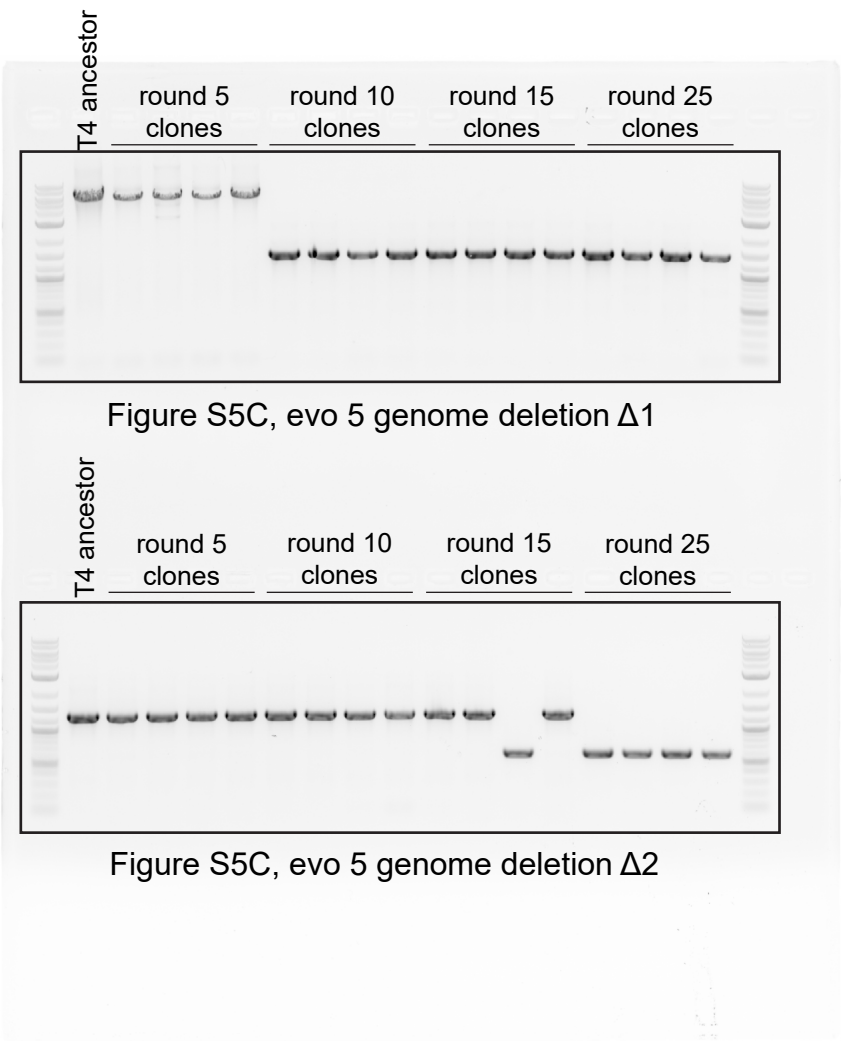

Supplement: supp [file Figures_source-data_labelled-gels.pdf › gels/Figures_source-data_labelled-gels.pdf]
