# Supplementary figures and images for: The evolution of a counter-defense mechanism in a virus constrains its host range
Source: eLife journal article supplement (doi:10.7554/elife.79549), 2022-08-04

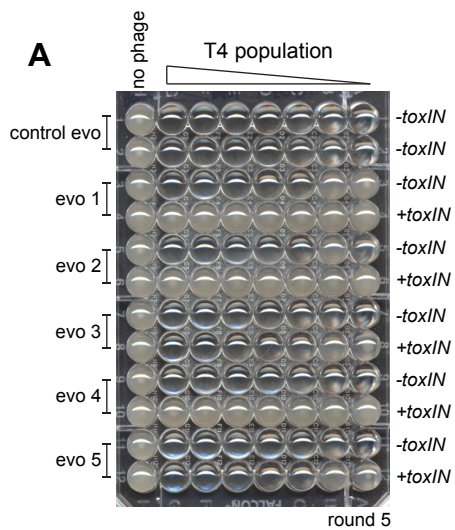

**B**

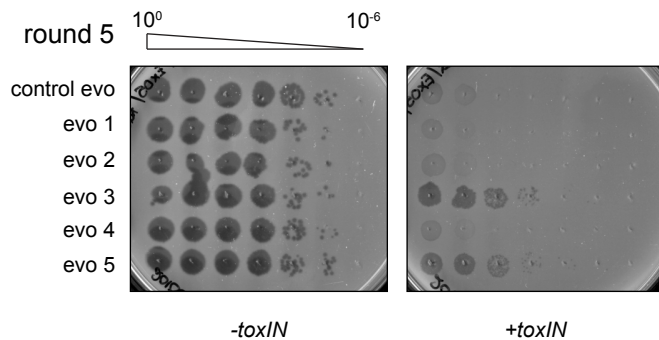

Supplement: supp [file elife_poa_e79549_Figure_1_figure_supplement_1.pdf › elife_poa_e79549_Figure_1_figure_supplement_1.pdf]

**A**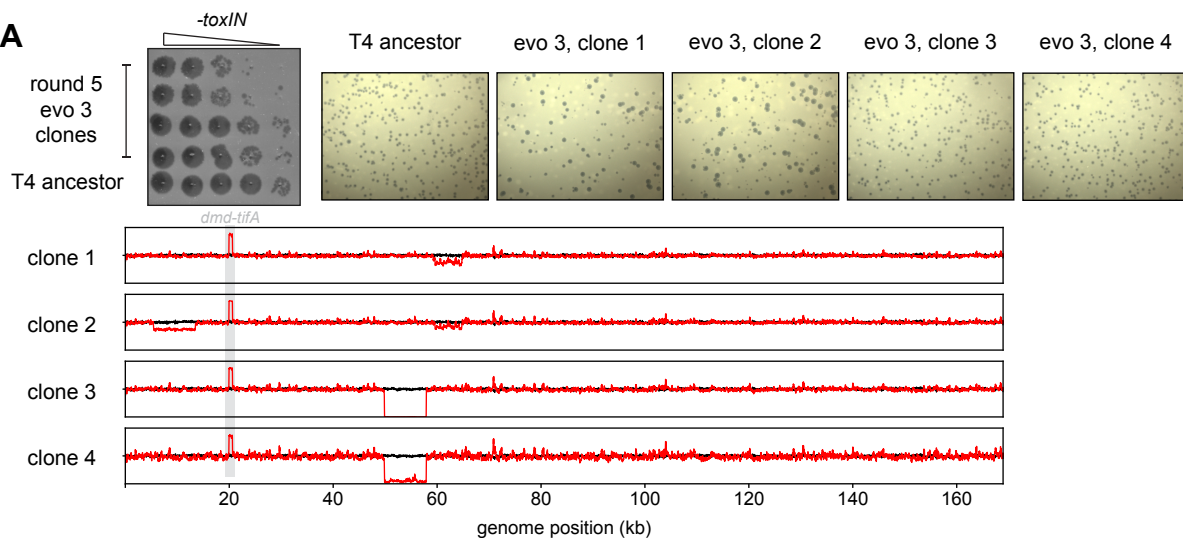**B**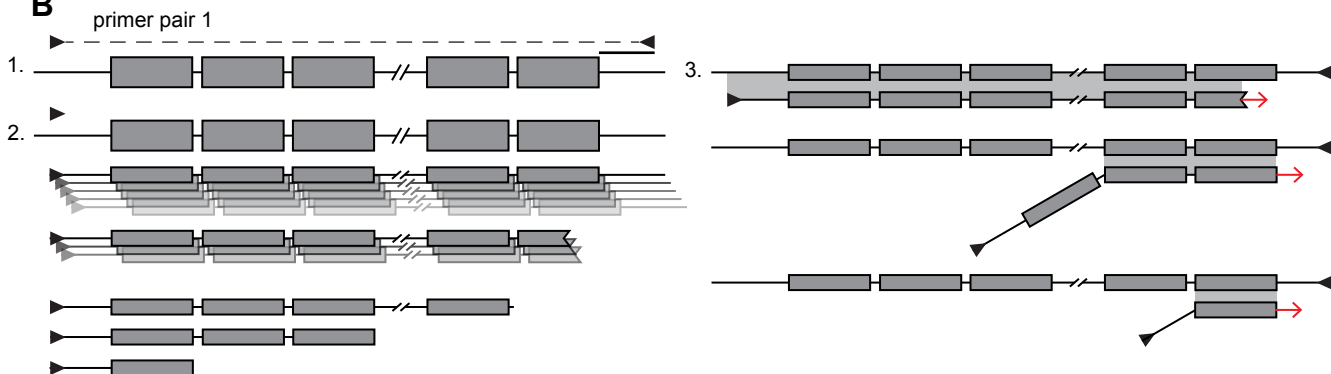

Supplement: supp [file elife_poa_e79549_Figure_1_figure_supplement_2.pdf › elife_poa_e79549_Figure_1_figure_supplement_2.pdf]

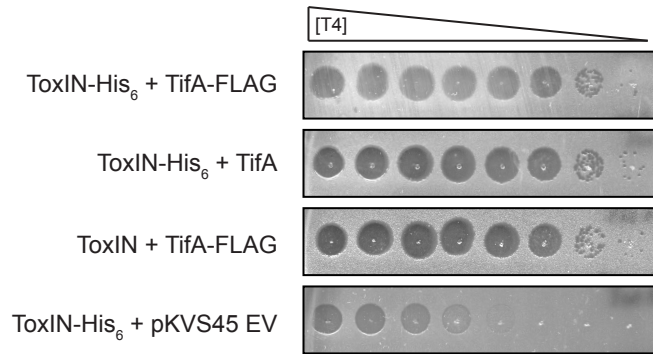

Supplement: supp [file elife_poa_e79549_Figure_2_figure_supplement_1.pdf › elife_poa_e79549_Figure_2_figure_supplement_1.pdf]

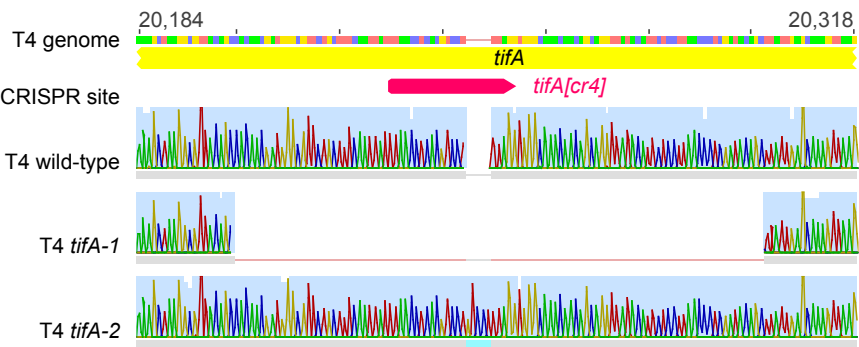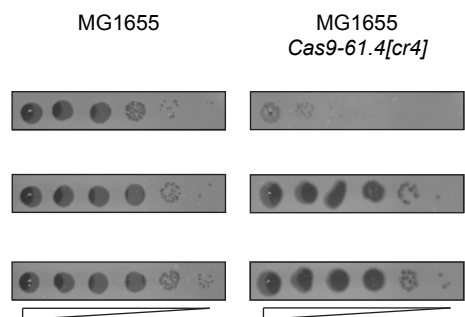

Supplement: supp [file elife_poa_e79549_Figure_2_figure_supplement_2.pdf › elife_poa_e79549_Figure_2_figure_supplement_2.pdf]

## Consensus

## Sequence Logo

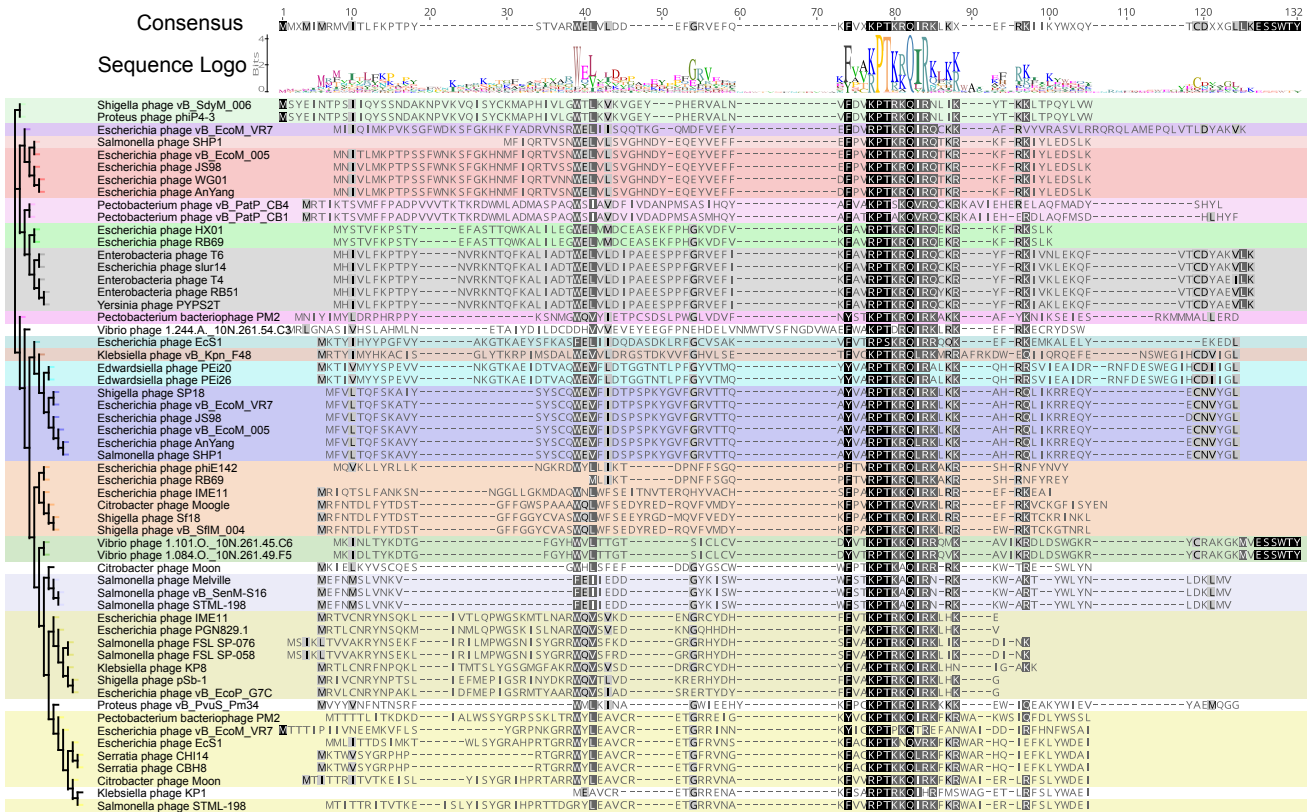

Supplement: supp [file elife_poa_e79549_Figure_3_figure_supplement_1.pdf › elife_poa_e79549_Figure_3_figure_supplement_1.pdf]

**A**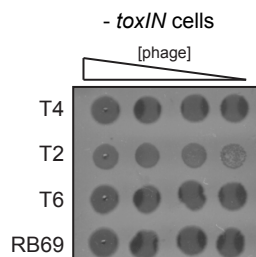**B**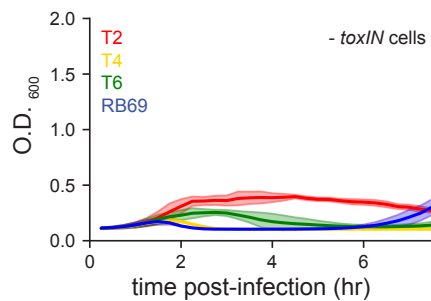**C**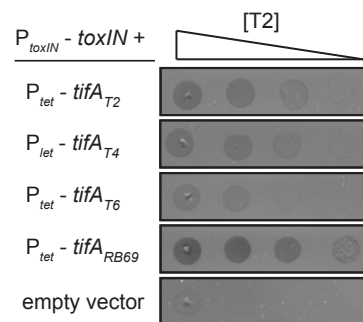

Supplement: supp [file elife_poa_e79549_Figure_3_figure_supplement_2.pdf › elife_poa_e79549_Figure_3_figure_supplement_2.pdf]

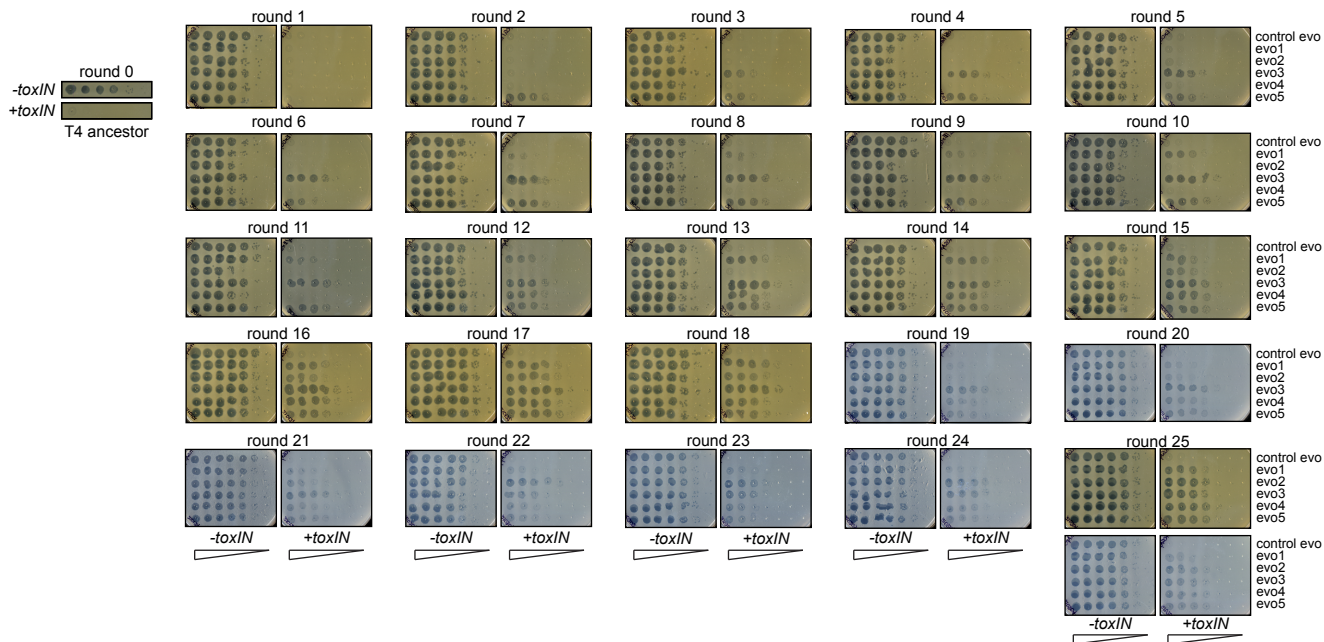

Supplement: supp [file elife_poa_e79549_Figure_4_figure_supplement_1.pdf › elife_poa_e79549_Figure_4_figure_supplement_1.pdf]

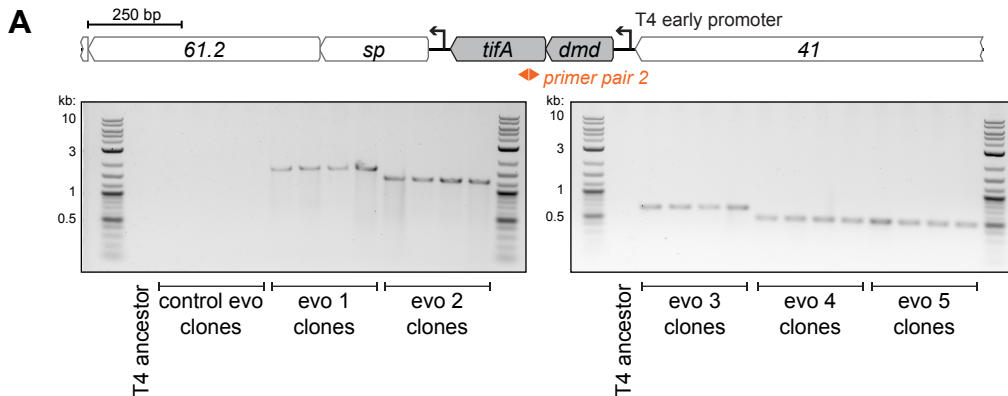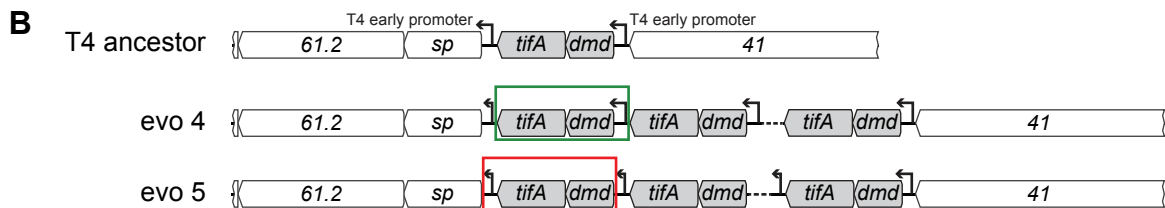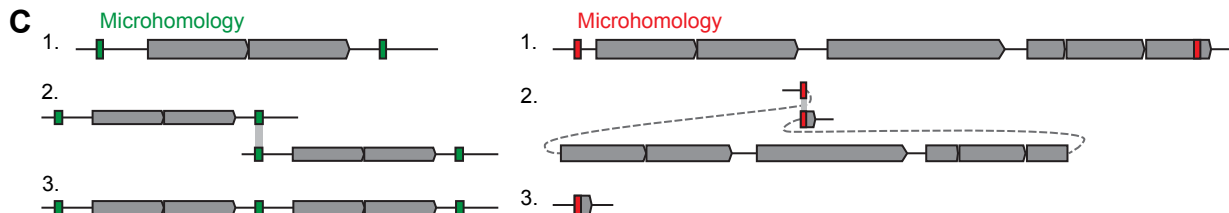

Supplement: supp [file elife_poa_e79549_Figure_4_figure_supplement_2.pdf › elife_poa_e79549_Figure_4_figure_supplement_2.pdf]

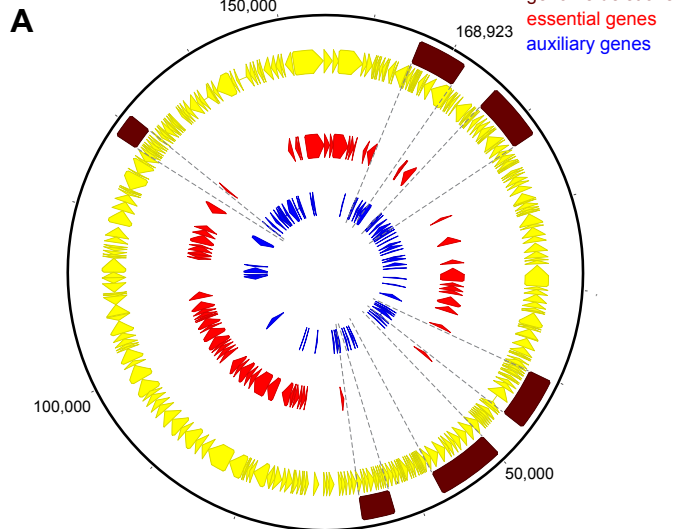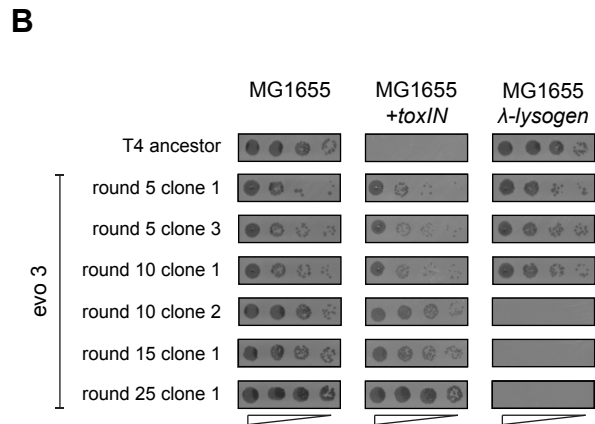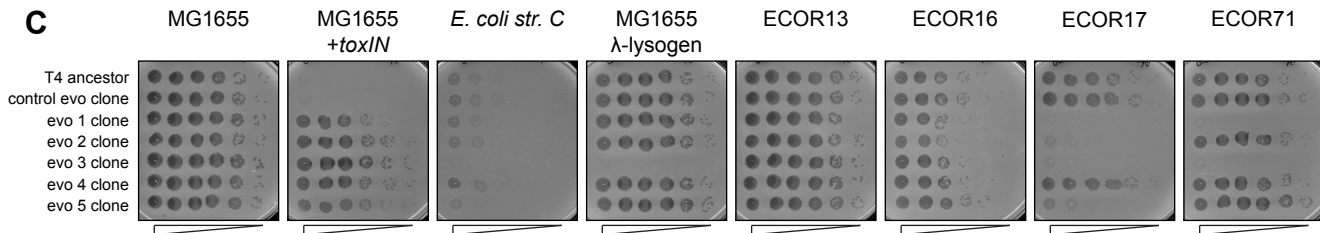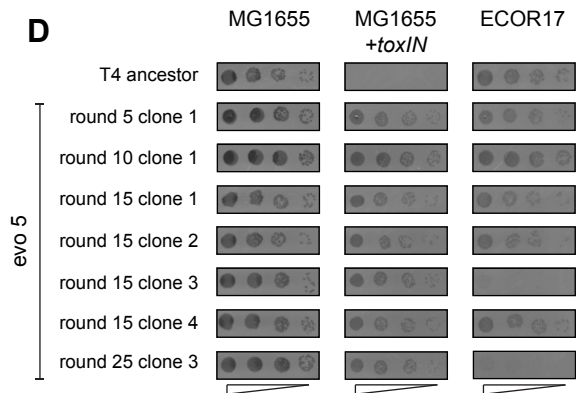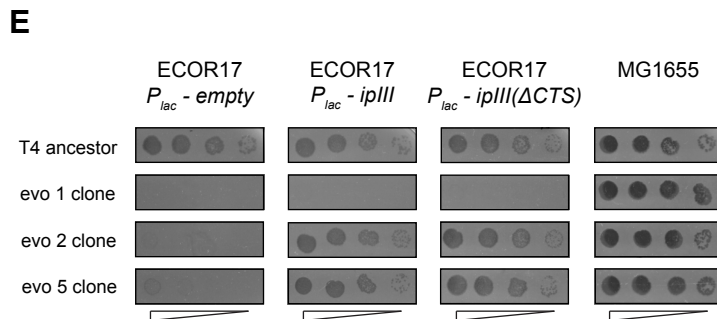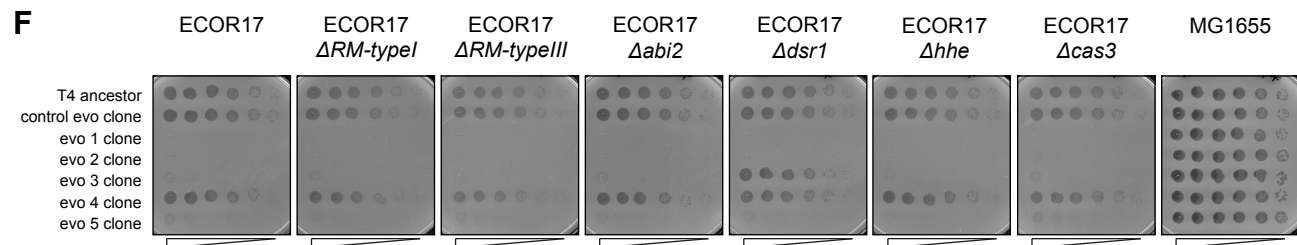

Supplement: supp [file elife_poa_e79549_Figure_6_figure_supplement_1.pdf › elife_poa_e79549_Figure_6_figure_supplement_1.pdf]
